## Characterization of sulphonamide resistance genes and class 1 integron gene cassettes in Enterobacteriaceae, Central African Republic (CAR)

Thierry Frank<sup>1,2</sup>, Valérie Gautier<sup>2</sup>, Antoine Talarmin<sup>1</sup>, Raymond Bercion<sup>1</sup> and Guillaume Arlet<sup>2,3\*</sup>

<sup>1</sup>Institut Pasteur de Bangui, Bangui, Central African Republic; <sup>2</sup>Université Pierre et Marie Curie, Paris 6, EA 2392, Laboratoire de Bactériologie, F-75005, Paris, France; and <sup>3</sup>Service de Bactériologie-Hygiène, Hôpital Tenon, AP-HP, Paris, France

Received 11 July 2006; returned 8 August, 2006; revised 11 December 2006; accepted 12 December 2006

**Objectives:** The aim of this study was to characterize genes encoding sulphonamide resistance and gene cassettes associated with class 1 integrons in trimethoprim-sulphamethoxazole resistant Enterobacteriaceae recovered from Bangui, Central African Republic (CAR).

**Methods:** We studied 78 clinical Enterobacteriaceae isolates, including 16 extended-spectrum  $\beta$ -lactamases producers, 10 *Salmonella* and 9 *Shigella*, resistant to trimethoprim-sulphamethoxazole as assessed by the disc diffusion method. PCR was used to test for *sul1* and *sul2* genes. Class 1 integron resistance gene cassettes were characterized by directly sequencing PCR products obtained with primers recognising 5' and 3' conserved regions.

**Results:** The *sul1* gene was found in 67 isolates, the *sul2* gene in 72 isolates and both genes in 62 isolates, while the *int1* gene was found in 74 isolates. The most prevalent *dfr* genes were *dfrA7* (49%), *dfrA1* (17%) and *dfrA2d* (13%).

**Conclusion:** These results illustrate the wide distribution of sulphonamide and trimethoprim resistance genes among Enterobacteriaceae in Bangui (CAR).

Keywords: co-trimoxazole resistance, gene cassettes, antimicrobial agents

### Introduction

Sulphonamides and trimethoprim are inexpensive antibiotics that have a synergistic effect.<sup>1</sup> Consequently, they have been used in combination (co-trimoxazole) since 1968 for a wide range of clinical indications including uncomplicated urinary tract infections, enteric bacterial diseases and respiratory tract infections.<sup>1</sup> Plasmid-mediated resistance to sulphonamides and trimethoprim is normally due to the acquisition of novel target enzymes that are naturally resistant: dihydropteroate synthases for sulphonamides and dihydrofolate reductases for trimethoprim.<sup>2</sup> Three resistance genes, *sul1*, *sul2* and *sul3* encoding dihydropteroate synthases and more than 20 dihydrofolate reductase (*dfr*) genes have been described. Both groups of genes are associated with class 1 integrons residing in plasmids and/or the bacterial chromosome.<sup>2–4</sup>

Our knowledge of resistance to sulphonamides and trimethoprim in developing countries is not extensive. Some reports indicate that the prevalence of resistance in enterobacterial

pathogens isolated in these countries is very high (33–96%) compared to isolates from developed countries (7–24%).<sup>3,5–7</sup>

Recent studies in the Central African Republic (CAR) showed that more than 76% of Enterobacteriaceae recovered from urinary tract infections in 2000–2002 and from blood-stream infections in 1999 were resistant to co-trimoxazole.<sup>8,9</sup>

Here, we report the molecular characterization of sulphonamide resistance genes and gene cassettes associated with class I integrons in various Enterobacteriaceae including extended spectrum  $\beta$ -lactamase (ESBL) producers and enteric pathogens such as *Salmonella* and *Shigella* recovered at the Pasteur Institute, Bangui (CAR).

### Materials and methods

#### *Bacterial isolates and antimicrobial susceptibility testing*

Sixty-one ESBL-negative-Enterobacteriaceae isolated between October 2004 and June 2005 and 17 ESBL-producing

\*Corresponding author. Service de Bactériologie-Hygiène, Hôpital Tenon, AP-HP, rue de la Chine, 75970 Paris cedex 20, France.  
Tel: +33 1 56 01 70 1; Fax: +33 1 56 01 61 08; E-mail: guillaume.arlet@tnn.aphp.fr

## Sulphonamide resistance genes in Enterobacteriaceae

Enterobacteriaceae isolated between January 2003 and October 2005, were recovered at Pasteur Institute in Bangui (CAR) from clinical samples sent by four public health centres, one paediatric hospital and ambulatory medical visits; all these centres are located in Bangui, the capital of Central African Republic. The isolates (one isolate/patient) were associated with urinary tract infections ( $n = 47$ ), pneumonia in an AIDS patient ( $n = 1$ ), wound infections ( $n = 5$ ), vaginal colonizations ( $n = 5$ ), ear infection ( $n = 1$ ), meningitis infection ( $n = 1$ ), bacteraemia ( $n = 2$ ) and diarrhoeal diseases ( $n = 16$ ). These pathogen isolates included several bacterial species: *Escherichia coli*, *Klebsiella pneumoniae*, *Citrobacter freundii*, *Shigella spp.* and *Salmonella spp.* (Table 1).

All isolates were tested for their susceptibility to antimicrobial agents including trimethoprim-sulphamethoxazole (1.25/23.75  $\mu$ g) using a standard disc diffusion method on Mueller–Hinton agar (Bio-Rad, Marnes-La-Coquette, France) and interpreted according to the recommendations of the Comité de l'Antibiogramme de la Société Française de Microbiologie (CA-SFM at [www.sfm.asso.fr](http://www.sfm.asso.fr)). The isolates were scored as resistant and were selected if their inhibition zone diameter for co-trimoxazole was  $< 10$  mm. *E. coli* ATCC 25922 was used as control.

During this period, 73% of the ESBL-negative Enterobacteriaceae recovered from urinary tract infections were resistant to co-trimoxazole.

The ESBL-negative isolates included: *E. coli*, *K. pneumoniae*, *Enterobacter cloacae* and *Enterobacter aerogenes* (Table 1).

The ESBLs were previously characterized (except one) as CTX-M-3, CTX-M-15, SHV-12 and SHV-2a.<sup>10</sup>

### PCR screening of *sul* genes, class 1 integrase gene and characterization of class 1 integron resistance gene cassettes

All the PCR assays were carried out in a total volume of 50  $\mu$ L mixture containing the following reagents: DNA (100 ng), Primers (1  $\mu$ M), dNTP (200  $\mu$ M), Tris-HCl (10 mM; pH 8.3), KCl (50 mM), MgCl<sub>2</sub> (1.5 mM) and 1 U of *Taq* DNA polymerase.

The strains were screened for *sul1* and *sul2* by a multiplex PCR using specific oligonucleotide primers (Table 2) as previously described.<sup>11</sup> PCR using specific primers (Table 2) used to detect the *sul3* gene involved an annealing temperature at 53°C. Three *E. coli* clinical isolates (strains 02-57295, 02-58161 and 03-709) obtained in December 2002 and January 2003, in Tenon Hospital (France) and harbouring the *int11* gene and the *sul1* gene, the *sul2* gene and the *sul3* gene, respectively were used as positive controls (A. Doloy, G. Arlet, personal data). *E. coli* DH10B was used as negative control for PCR assays.

The integrase gene (*int1*) was detected by PCR using specific primers that amplified an amplicon of 899 bp (Table 2). The PCR conditions were as follows: initial denaturation (94°C for 5 min) followed by 35 cycles (94°C for 30 s, 60°C for 40 s and 72°C for 1 min). A final extension was performed at 72°C for 7 min.

**Table 1.** Characterization of sulphonamide resistance markers and antibiotic resistance gene cassettes inserted in class1 integron detected in Enterobacteriaceae isolated in CAR

| Clinical isolates <sup>a</sup>  | Isolates number <sup>b</sup> | Sulphonamide resistance markers |             |      | Integrase gene ( <i>int1</i> ) | Antibiotic resistance gene cassettes |              |              |                    |                     |                         |                     |
|---------------------------------|------------------------------|---------------------------------|-------------|------|--------------------------------|--------------------------------------|--------------|--------------|--------------------|---------------------|-------------------------|---------------------|
|                                 |                              | <i>sul1</i>                     | <i>sul2</i> | both |                                | <i>dfrA2d</i>                        | <i>dfrA5</i> | <i>dfrA7</i> | <i>dfrA1-aadA1</i> | <i>dfrA5-ere(A)</i> | <i>dfrA12-ORF-aadA8</i> | <i>dfrA17-aadA5</i> |
| <i>E. coli</i> (ESBLs)          | 9                            | 8                               | 7           | 6    | 8                              | 4                                    | 1            | 2            | 0                  | 0                   | 0                       | 2                   |
| <i>E. coli</i> (no ESBLs)       | 34                           | 29                              | 33          | 28   | 32                             | 1                                    | 1            | 18           | 6                  | 2                   | 2                       | 3                   |
| <i>K. pneumoniae</i> (ESBLs)    | 5                            | 5                               | 4           | 4    | 5                              | 2                                    | 0            | 1            | 2                  | 0                   | 0                       | 0                   |
| <i>K. pneumoniae</i> (no ESBLs) | 2                            | 2                               | 2           | 2    | 2                              | 0                                    | 0            | 2            | 0                  | 0                   | 0                       | 0                   |
| <i>C. freundii</i>              | 6                            | 6                               | 6           | 6    | 6                              | 0                                    | 0            | 1            | 1                  | 0                   | 4                       | 0                   |
| <i>E. cloacae</i> (ESBLs)       | 2                            | 1                               | 2           | 1    | 2                              | 0                                    | 0            | 2            | 0                  | 0                   | 0                       | 0                   |
| <i>E. aerogenes</i> (ESBL)      | 1                            | 1                               | 1           | 1    | 1                              | 1                                    | 0            | 0            | 0                  | 0                   | 0                       | 0                   |
| <i>Shigella spp.</i>            | 9                            | 7                               | 9           | 7    | 8                              | 2                                    | 0            | 4            | 2                  | 0                   | 0                       | 0                   |
| <i>Salmonella sp.</i>           | 10                           | 9                               | 8           | 7    | 10                             | 0                                    | 0            | 8            | 2                  | 0                   | 0                       | 0                   |
| Total                           | 78                           | 68                              | 72          | 62   | 74                             | 10                                   | 2            | 38           | 13                 | 2                   | 6                       | 5                   |

<sup>a</sup>The enteric pathogen isolates included several species of *Shigella* (*S. dysenteriae* A2, *S. flexneri* 1b, *S. flexneri* and *S. boydii*) and *Salmonella* (*S. Enteritidis*, *S. Stanleyville* and *S. Typhimurium*).

<sup>b</sup>All isolates were not found clonally related by rep-PCR or ERIC-PCR.

<sup>c</sup>All isolates carried one *dfr* gene (except one *Shigella* sp.).

**Table 2.** Sequences of the primers used to amplify the sulphonamide resistance genes, class 1 integrase gene and resistance gene cassettes

| Primer name            | Primer sequence        | Primer position        | PCR target                             | Reference  |
|------------------------|------------------------|------------------------|----------------------------------------|------------|
| <i>Sul1</i> upper      | CGGCGTGGGCTACCTGAACG   | 1709–1728 (AY655485.1) | <i>sul1</i> gene                       | 11         |
| <i>Sul1</i> lower      | GCCGATCGCGTGAAGTTCCG   | 2122–2141 (AY655485.1) | <i>sul1</i> gene                       | 11         |
| <i>Sul2</i> upper      | GCGCTCAAGGCAGATGGCATT  | 244–264 (AY360321.1)   | <i>sul2</i> gene                       | 11         |
| <i>Sul2</i> lower      | GCGTTTGATACCGGCACCCGT  | 508–528 (AY360321.1)   | <i>sul2</i> gene                       | 11         |
| <i>Sul3</i> forward    | GGAAGAAATCAAAAAGACTCAA | 3155–3175 (AJ459418.2) | <i>sul3</i> gene                       | this study |
| <i>Sul3</i> reverse    | CCTAAAAAGAAGCCCATACC   | 3517–3498 (AJ459418.2) | <i>sul3</i> gene                       | this study |
| <i>Int1</i> upper      | ATGGCCGAGCAGATCCTGCACG | 105–126 (DQ393784.1)   | integrase gene                         | this study |
| <i>Int1</i> lower      | GCCACTGCGCCGTTACCACCGC | 983–1004 (DQ393784.1)  | integrase gene                         | this study |
| 5'CS ( <i>intI1</i> )  | AAACGGATGAAGGCACGAAC   | 24–43 (AY152821.1)     | variable region of class 1 integron    | this study |
| 3'CS ( <i>qacEΔ1</i> ) | ATTGCGATAACAAGAAAAAGCC | 2160–2181 (AY152821.1) | variable region of class 1 integron    | this study |
| <i>dfrA1</i> upper     | AGCATTACCCAACCGAAAAGT  | 273–292 (DQ875875.1)   | gene cassette <i>dfrA1-aadA1</i>       | this study |
| <i>aadA1</i> lower     | TGTCAGCAAGATAGCCAGAT   | 1072–1091 (DQ875875.1) | gene cassette <i>dfrA1-aadA1</i>       | this study |
| <i>dfrA2d</i> upper    | CGGTTTCGCATTCCCATCAA   | 168–186 (AY973253.1)   | <i>dfrA 2d</i> gene                    | this study |
| <i>dfrA2d</i> lower    | GGACTGAGCCTGGGTGAGA    | 324–306 (AY973253.1)   | <i>dfrA 2d</i> gene                    | this study |
| <i>dfrA7</i> upper     | AAATGGCGTAATCGGTAATG   | 151–170 (AJ884724.1)   | <i>dfrA7</i> gene                      | this study |
| <i>dfrA7</i> lower     | GTGAACAGTAGACAAATGAAT  | 475–455 (AJ884724.1)   | <i>dfrA7</i> gene                      | this study |
| <i>dfrA12</i> upper    | CAACGCTGTCGCACGCTATC   | 557–576 (Z21672.1)     | gene cassette <i>dfrA12-orfF-aadA8</i> | this study |
| <i>aadA8</i> lower     | CTACCAAGGCAACGCTATGT   | 430–449 (DQ149925)     | gene cassette <i>dfrA12-orfF-aadA8</i> | this study |
| <i>dfrA5</i> upper     | TGGCGGGGAGATTTACAGA    | 410–428 (AB188269.1)   | gene cassettes <i>dfrA5-ereA2</i>      | this study |
| <i>ere(A)</i> lower    | TTTCAGGACAGGGGCAAGC    | 1361–1343 (AB188269.1) | gene cassettes <i>dfrA5-ereA2</i>      | this study |

The variable region of class 1 integrons was amplified by PCR using primers (Table 2) specific for the 5' conserved segment (5'CS) and 3' conserved segment (3'CS). Thermal cycler conditions were 94°C for 5 min followed by 35 cycles (94°C for 30 s, 60°C for 1 min, and 72°C for 2 min) and a final extension at 72°C for 7 min.

PCR products were subjected to DNA sequencing using PCR primers with an ABI PRISM 3100 Genetic Analyser sequencing (Applied Biosystems). Additional sequencing primers (Table 2) were designed using Oligo4 software and used for DNA sequencing.

Sequences obtained were analysed by comparison with the sequences in databases by BLASTN ([www.ncbi.nlm.nih.gov](http://www.ncbi.nlm.nih.gov)) and Clustal W (<http://www.ebi.ac.uk/>).

## Results and discussion

The PCR analysis indicated that 72 isolates (92%) carried the *sul1* gene, 67 (86%), the *sul2* gene and 62 (80%) carried both *sul1* and *sul2* genes while *sul3* was not found (Table 1). The frequencies of *sul1* and *sul2* genes found among our isolates are in conformity with the data previously reported.<sup>3,11</sup> However, both *sul1* and *sul2* gene frequencies were higher in the current isolates than has been previously published from European countries.<sup>11–14</sup>

Seventy-four isolates (95%) were positive for the class 1 integrase gene while nine isolates (11%) were negative for *sul1* but positive for *sul2* as has previously described in Portuguese *Salmonella* and London *E. coli* strains.<sup>12,14</sup> Three other *E. coli* isolates were *sul1* positive and *int1* negative. Previously, one plasmid has been described carrying a class 1 integron and a truncated *int1* gene which could have given similar results.<sup>15</sup>

Six *dfr* genes encoding dihydrofolate reductase were identified in 76 isolates (97%) with *dfrA7* frequencies being the most

common (38 isolates; 48%) (Table 1). This correlates with a previous study of Senegalese isolates.<sup>16</sup> The *dfrA1* gene was the second most common, in 13 strains (17% of isolates) (Table 1) and has previously been associated with blood culture isolates in European hospitals.<sup>17</sup> *dfrA2d* was the third most common gene, in 10 strains (13% of isolates) (Table 1) and in the CAR isolates is associated with ESBLs. Two *E. coli* isolates carried *dfrA5* gene.

We detected three linkages between streptomycin resistance and *dfr* genes and one linkage with erythromycin esterase [*ere(A)*] and *dfr* genes (Table 1). All four of these linkages have previously been described.<sup>18–22</sup>

In CAR, the combinations of trimethoprim-sulfamethoxazole and pyrimethamine-sulfadoxine (Fansidar<sup>®</sup>) has been extensively used for bacterial treatment and antimalarial prophylaxis, respectively.<sup>8,23</sup> Thus, it is not surprising that 73% of urinary pathogen Enterobacteriaceae were resistant to co-trimoxazole and that 90% of the isolates examined carried *sul* and *int1* genes and >95% carried *dfr* genes, similar results have been found in other studies of African isolates but this carriage rate is higher than reported in Europe or America.<sup>16, 18–22,24</sup>

## Acknowledgements

T. Frank receives a fellowship from the Institut Pasteur de Paris and the French Government. This work was financed by grants from the French Government (Project 2001-168, FSP-C1 'Antibiorésistance') and by the Faculté de Médecine Pierre et Marie Curie, Université Pierre et Marie Curie (Paris VI).

## Transparency declarations

None to declare.

## Sulphonamide resistance genes in Enterobacteriaceae

### References

1. Huovinen P. Resistance to trimethoprim-sulfamethoxazole. *Clin Infect Dis* 2001; **32**: 1608–14.
2. Skold O. Resistance to trimethoprim and sulfonamides. *Vet Res* 2001; **32**: 261–73.
3. Huovinen P, Sundstrom L, Swedberg G *et al.* Trimethoprim and sulfonamide resistance. *Antimicrob Agents Chemother* 1995; **39**: 279–89.
4. Mazel D. Integrons: agents of bacterial evolution. *Nat Rev Microbiol* 2006; **4**: 608–20.
5. Habib AG, Nwokedi EE, Ihesiulor UI *et al.* Widespread antibiotic resistance in savannah Nigeria. *Afr J Med Med Sci* 2003; **32**: 303–5.
6. Kariuki S, Revathi G, Muyodi J *et al.* Characterization of multidrug-resistant typhoid outbreaks in Kenya. *J Clin Microbiol* 2004; **42**: 1477–82.
7. Vila J, Vargas M, Casals C *et al.* Antimicrobial resistance of diarrheagenic *Escherichia coli* isolated from children under the age of 5 years from Ifakara, Tanzania. *Antimicrob Agents Chemother* 1999; **43**: 3022–4.
8. Kassa-Kelembho E, Mbolidi CD, Service YB *et al.* Bacteremia in adults admitted to the Department of Medicine of Bangui Community Hospital (Central African Republic). *Acta Trop* 2003; **89**: 67–72.
9. Hima-Lerible H, Menard D, Talarmin A. Antimicrobial resistance among uropathogens that cause community-acquired urinary tract infections in Bangui, Central African Republic. *J Antimicrob Chemother* 2003; **51**: 192–4.
10. Frank T, Arlet G, Gautier V *et al.* Extended-spectrum  $\beta$ -lactamase-producing Enterobacteriaceae, Central African Republic. *Emerg Infect Dis* 2006; **12**: 863–5.
11. Kern MB, Klemmensen T, Frimodt-Moller N *et al.* Susceptibility of Danish *Escherichia coli* strains isolated from urinary tract infections and bacteraemia, and distribution of *sul* genes conferring sulphonamide resistance. *J Antimicrob Chemother* 2002; **50**: 513–16.
12. Bean DC, Livermore DM, Papa I *et al.* Resistance among *Escherichia coli* to sulphonamides and other antimicrobials now little used in man. *J Antimicrob Chemother* 2005; **56**: 962–4.
13. Grape M, Sundstrom L, Kronvall G. Sulphonamide resistance gene *sul3* found in *Escherichia coli* isolates from human sources. *J Antimicrob Chemother* 2003; **52**: 1022–4.
14. Antunes P, Machado J, Sousa JC *et al.* Dissemination of sulphonamide resistance genes (*sul1*, *sul2*, and *sul3*) in Portuguese *Salmonella enterica* strains and relation with integrons. *Antimicrob Agents Chemother* 2005; **49**: 836–9.
15. Jens K, Oleg R. Sequence analysis of the mobile genome island pKLC102 of *Pseudomonas aeruginosa* C. *J Bacteriol* 2004; **186**: 518–34.
16. Gassama A, Aidara-Kane A, Chainier D *et al.* Integron-associated antibiotic resistance in enteroaggregative and enteroinvasive *Escherichia coli*. *Microb Drug Resist* 2004; **10**: 7–30.
17. Heir E, Lindstedt BA, Leegaard TM *et al.* Prevalence and characterization of integrons in blood culture Enterobacteriaceae and gastrointestinal *Escherichia coli* in Norway and reporting of a novel class 1 integron-located lincosamide resistance gene. *Ann Clin Microbiol Antimicrob* 2004; **3**: 12.
18. Martinez-Freijo P, Fluit AC, Schmitz FJ *et al.* Many class I integrons comprise distinct stable structures occurring in different species of Enterobacteriaceae isolated from widespread geographic regions in Europe. *Antimicrob Agents Chemother* 1999; **43**: 686–9.
19. Gestal AM, Stokes HW, Partridge SR *et al.* Recombination between the *dfrA12-orfF-aadA2* cassette array and an *aadA1* gene cassette creates a hybrid cassette, *aadA8b*. *Antimicrob Agents Chemother* 2005; **49**: 4771–4.
20. Kang HY, Jeong YS, Oh JY *et al.* Characterization of antimicrobial resistance and class 1 integrons found in *Escherichia coli* isolates from humans and animals in Korea. *J Antimicrob Chemother* 2005; **55**: 639–44.
21. Peters ED, Leverstein-van Hall MA, Box AT *et al.* Novel gene cassettes and integrons. *Antimicrob Agents Chemother* 2001; **45**: 2961–4.
22. Soge OO, Adenihy BA, Roberts MC. New antibiotic resistance genes associated with CTX-M-plasmids from uropathogenic Nigerian *Klebsiella pneumoniae*. *J Antimicrob Chemother* 2006; **58**: 1048–53.
23. Schubert C. New malaria drug to be unveiled in Africa. *Nat Med* 2003; **9**: 1097.
24. Blahna MT, Zalewski CA, Reuer J *et al.* The role of horizontal gene transfer in the spread of trimethoprim-sulfamethoxazole resistance among uropathogenic *Escherichia coli* in Europe and Canada. *J Antimicrob Chemother* 2006; **57**: 666–72.
